# Supplementary material for: Molecular Organisation of Tick-Borne Encephalitis Virus
Source: Preprints.org preprint supplement (doi:10.20944/preprints202204.0001.v1), 2022-04-01
Supplement: Supplementary file 1 [file File_S6_E-heterodimer-interface-interactions.xlsx]

## Sheet: Sheet1
Hydrogen bonds < 3.5 Å										Salt bridges < 4Å
TBEV										TBEV										Buried Interface	1095 Å^2
Donor				Acceptor				Distance		Chain 1				Chain 2				Distance		ΔiG kcal/mol	-8
Asymmetric unit	Chain	Residue	Atom	Asymmetric unit	Chain	Residue	Atom			Asymmetric unit	Chain	Residue	Atom	Asymmetric unit	Chain	Residue	Atom
1	A	Arg187	NE	2	C	Asp380	OD2	3.2		1	A	Arg187	NE	2	C	Asp380	OD2	3.2
2	C	Gln391	NE2	1	A	Val167	O	3.3		1	A	His347	NE2	2	C	Glu291	OE2	4
1	B	Tyr384	OH	1	C	Glu170	OE1	2.7		1	C	Arg187	NH2	1	B	Asp380	OD2	2.7
1	B	Gln391	NE2	1	C	Ser169	O	2.9		1	C	Arg187	NE	1	B	Asp380	OD2	4
1	C	Arg187	NH2	1	B	Asp380	OD2	2.7									Total	4
							Total	5
TBEV (5O6A)										TBEV (5O6A)										Buried Interface	1345.3 Å^2
Donor				Acceptor				Distance		Donor				Acceptor				Distance		ΔiG kcal/mol	-14
Asymmetric unit	Chain	Residue	Atom	Asymmetric unit	Chain	Residue	Atom			Asymmetric unit	Chain	Residue	Atom	Asymmetric unit	Chain	Residue	Atom
1	A	Ser190	OG	2	C	Asp380	OD2	3.5		1	A	Arg187	NE	2	C	Asp380	OD2	3.58
1	B	Tyr384	OH	1	C	Glu170	OE1	2.9		1	A	Glu291	OE1	2	C	His347	NE2	3.93
1	B	Gln391	N	1	B	Val167	O	2.9		1	B	His347	NE2	1	C	Glu291	OE1	3.54
1	B	Gln391	NE2	1	C	Ser169	O	3.4		1	B	His347	NE2	1	C	Glu291	OE2	3.52
2	C	Tyr384	OH	1	A	Glu170	OE1	2.6		1	B	Asp380	OD2	1	C	Arg187	NE	3.86
2	C	Gln391	N	1	A	Val167	O	2.7									Total	5
2	C	Gln391	NE2	1	A	Ser169	O	3.4
							Total	7
Spondweni (6ZQV)										Spondweni (6ZQV)										Buried Interface	2170 Å^2
Donor				Acceptor				Distance		Chain 1				Chain 2				Distance		ΔiG kcal/mol	-13.5
Asymmetric unit	Chain	Residue	Atom	Asymmetric unit	Chain	Residue	Atom			Asymmetric unit	Chain	Residue	Atom	Asymmetric unit	Chain	Residue	Atom
1	A	Ser88	OG	1	C	Ala86	O	2.7		1	A	Arg57	NH1	2	C	Glu79	OD2	3.7
1	A	Arg293	NH2	1	E	Asp349	OD1	3.4		1	A	Arg57	NH1	2	C	Glu79	OE2	4
1	A	Lys295	NZ	1	E	Asn351	OD1	2.6		1	A	Glu79	OE1	2	C	Arg57	NH1	3.7
1	A	Ser195	OG	1	E	Asp385	OD1	2.9									Total	3
1	A	Ser195	OG	1	E	Asp385	OD2	3.4
1	C	Arg57	NH1	1	A	Glu79	OE2	3.5
1	C	Tyr81	OH	1	A	Asn234	O	3.2
1	C	Ser88	OG	1	A	Ala86	O	2.6
1	C	Arg176	NE	2	B	Thr398	OG1	3.3
1	C	Ser195	OG	2	B	Asp385	OD1	3.1
1	C	Ser232	OG	1	A	Asp83	OD1	3.3
2	B	His400	N	1	C	Ala172	O	3
2	B	Thr500	OG1	1	C	Glu190	OE1	2.6
2	B	Thr500	OG1	1	C	Glu190	OE2	3
1	E	Thr350	OG1	1	A	Glu190	OE1	2.3
1	E	Tyr387	OH	1	A	Cys191	O	2.6
1	E	His400	N	1	A	Ala172	O	2.9
							Total	17
Usutu (7LCH)										Usutu (7LCH)										Buried Interface	1745 Å^2
Donor				Acceptor				Distance		Chain 1				Chain 2				Distance		ΔiG kcal/mol	-12.5
Asymmetric unit	Chain	Residue	Atom	Asymmetric unit	Chain	Residue	Atom			Asymmetric unit	Chain	Residue	Atom	Asymmetric unit	Chain	Residue	Atom
1	A	Asn194	ND2	1	E	Asp380	OD1	2.5									Total	0
1	A	Asn194	ND2	1	E	Asp380	OD1	2.9
1	C	Asn172	ND2	2	A	Asn313	OD1	2.9
1	C	Asn193	N	2	A	His395	ND1	3.4
1	C	Asn193	NE	2	A	His395	OD1	2.7
1	C	Asn195	ND2	2	A	Asp380	OD2	2.6
1	E	Leu345	N	1	A	Glu189	OE2	3.2
1	E	Tyr382	N	1	A	Cys190	O	2.3
1	E	His394	ND1	1	A	Asn172	OD1	2.3
1	E	His395	N	1	A	Pro171	O	2.9
2	A	Leu345	N	1	C	Glu189	OE2	3.3
2	A	Tyr382	OH	1	C	Cys190	O	2.4
2	A	His395	N	1	C	Pro171	O	2.9
							Total	13
Zika (6CO8)										Zika (6CO8)										Buried Interface	2291 Å^2
Donor				Acceptor				Distance		Chain 1				Chain 2				Distance		ΔiG kcal/mol	-22
Asymmetric unit	Chain	Residue	Atom	Asymmetric unit	Chain	Residue	Atom			Asymmetric unit	Chain	Residue	Atom	Asymmetric unit	Chain	Residue	Atom
1	A	Thr88	OG1	1	C	Ser86	O	2.4		1	A	Arg57	NH1	2	C	Glu79	OD2	3.7
1	A	Arg94	NH1	1	C	Asn237	OD1	3.3		1	C	Glu191	OE1	2	C	His399	NE2	3.9
1	A	Ser129	OG1	1	C	Thr76	O	3.2									Total	2
1	A	Gln131	NE2	1	C	Thr76	OG1	2.8
1	A	Arg193	N	1	E	His399	ND1	3.2
1	A	Arg193	NE	1	E	His399	O	3.2
1	C	Thr88	OG1	1	A	Ser86	O	3.3
1	C	Ser129	OG	1	A	Thr76	O	3.1
1	C	Gln131	NE2	1	A	Thr76	OG1	2.4
1	C	Arg193	N	2	C	His399	ND1	3.1
1	C	Arg193	NE	2	C	His399	O	2.8
1	C	Thr194	OG1	2	C	Asp384	OD1	3.1
1	C	Thr194	OG1	2	C	Asp384	OD2	3.3
1	E	Tyr386	OH	1	A	Cys190	O	2.4
1	E	His399	N	1	A	Pro171	O	3.1
							Total	15
Dengue (6ZQU)										Dengue (6ZQU)										Buried Interface	2484 Å^2
Donor				Acceptor				Distance		Chain 1				Chain 2				Distance		ΔiG kcal/mol	-12
Asymmetric unit	Chain	Residue	Atom	Asymmetric unit	Chain	Residue	Atom			Asymmetric unit	Chain	Residue	Atom	Asymmetric unit	Chain	Residue	Atom
1	A	Ser81	OG	1	E	Asp225	OD2	3		1	A	Glu79	OE1	1	E	Arg57	NE	4
1	A	Lys88	N	1	E	Gln86	O	2.3		1	A	Glu79	OE1	1	E	Arg57	NH1	3.3
1	A	Ile170	N	2	E	Lys388	O	3		1	C	Lys388	NZ	1	E	Glu184	OE1	3.7
1	A	Arg188	NE	2	E	Asn390	O	2.7		1	C	Glu343	OE1	1	E	Arg286	NH1	3.7
1	A	Arg210	NH2	1	E	Thr76	O	3.3		1	C	Glu343	OE2	1	E	Arg286	NH1	3.3
1	A	Arg288	NH1	2	E	Leu342	O	3.4									Total	5
1	C	Lys388	NZ	1	E	Glu184	OE2	2.8
1	C	Asn390	ND2	1	E	Ser186	OG	2.9
1	E	Arg73	NH1	1	A	Thr55	O	3.4
1	E	Lys88	N	1	A	Gln86	O	2.4
1	E	Ser169	OG	1	C	Lys388	O	2.3
1	E	Ser186	OG	1	C	Asn390	O	3.3
1	E	Thr189	OG1	1	C	Asp375	OD1	2.3
1	E	Ser229	OG	1	A	Gln86	OE1	2.3
2	E	Lys394	NZ	1	A	Asn194	OD1	2.6
							Total	15
