# Supplementary material for: Molecular Organisation of Tick-Borne Encephalitis Virus
Source: Preprints.org preprint supplement (doi:10.20944/preprints202204.0001.v1), 2022-04-01
Supplement: Supplementary file 3 [file Table_S1.docx]

**Table S1**. Cryo-EM data collection, reconstruction, and modelling statistics

| **Data collection and processing** |  |  |
| --- | --- | --- |
|  | **Preparation 1** | **Final** |
| Microscope | Thermo Fisher Titan Krios | Thermo Fisher Titan Krios |
| Detector | Gatan K2 | Gatan K3 |
| Magnification | 165 000 | 81 000 |
| Voltage (kV) | 300 | 300 |
| Electron exposure (e- / Å2) | 28.3 | 40 |
| Defocus (μm) | -0.9 – -3.0 | -0.7 – -2.7 |
| Defocus increment (μm) | 0.3 | 0.2 |
| Pixel size (Å) | 0.82 | 1.08 |
| Symmetry imposed | I2 | I2 |
| Initial particle images (no.) | 229 504 | 763613 |
| Final particle images (no.) | 15 150 | 119 210 |
| Map resolution (Å) | 3.5 | 3.3 |
| FSC threshold | 0.143 | 0.143 |
| Map resolution range (Å) | 3.2 – 999 | 3.0 – 999 |
| **Refinement** |  |  |
| Map sharpening B factor (Å2) | -5 | -5 / variable (see text) |
| Model composition |  |  |
| Non-hydrogen atoms | n/a | 13194 |
| Protein residues | n/a | 1703 |
| Ligands | n/a | 9 |
| R.m.s deviations |  |  |
| Bond lengths (Å) | n/a | 0.29 |
| Bond angles (°) | n/a | 0.54 |
| Validation |  |  |
| MolProbity score | n/a | 1.28 |
| Clashscore | n/a | 4 |
| Ramachandran plot |  |  |
| Favored (%) | n/a | 98 |
| Allowed (%) | n/a | 2 |
| Disallowed (%) | n/a | 0 |
